# Supplementary material
Source: PubMed Central journal article supplement (PMC10992434)
Supplement: 262_2021_3124_MOESM1_ESM.pdf [file 262_2021_3124_MOESM1_ESM.pdf]

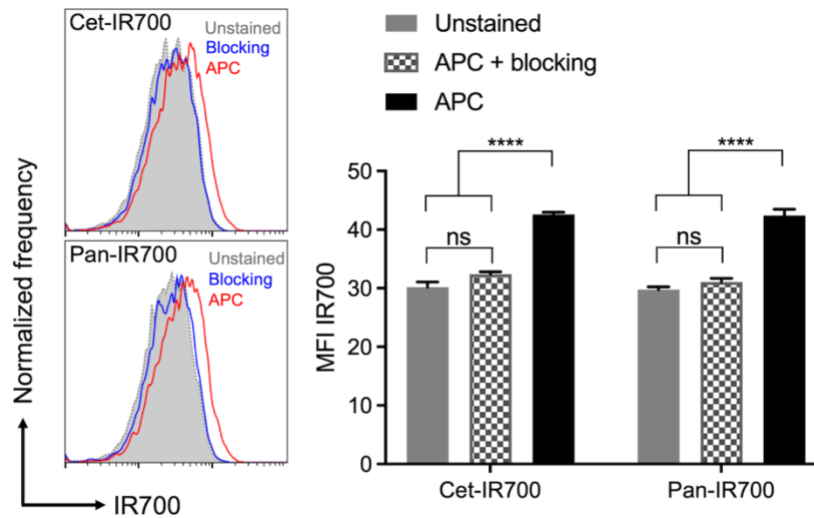

**Fig. S1 APC binding to the mEERL-hEGFR cells**

To confirm the binding of IR700 conjugated antibodies to mEERL-hEGFR cells, the cells ( $2 \times 10^5$ ) were seeded into each corner well of 12-well plate. After one day, the cells were incubated with  $10 \mu\text{g}/\text{mL}$  of each APC for 1 h at  $37^\circ\text{C}$ . After washing with PBS, the fluorescence of the cells was analyzed with a flow cytometer (FACSCalibur, BD Biosciences, San Jose, CA, USA) and FlowJo software (BD Biosciences). To confirm the specific binding of the APCs, 10-fold excess of each unconjugated antibody was added to some samples 1 h prior to the administration of the APC. Histograms are representative results (left). Bar graphs shows Mean fluorescence intensity (MFI) of each sample ( $n = 4$ ; two-way ANOVA followed by Tukey's test; \*\*\*\*,  $p < 0.0001$ ; ns, not significant) (right)

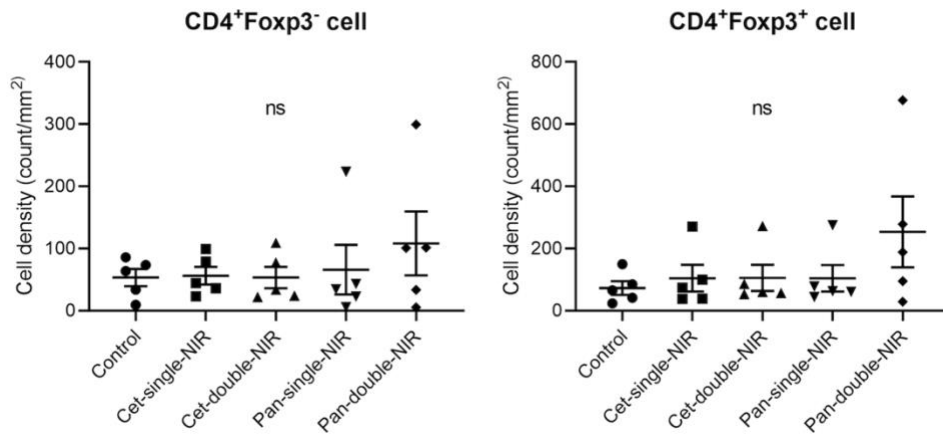

**Fig. S2 CD4<sup>+</sup> T cell accumulation into tumor**

Tumors were extracted 7 days after the initial light exposure. The specimens were assessed by multiplex IHC staining (Fig. 5). Intratumoral CD4<sup>+</sup>Foxp3<sup>-</sup> and CD4<sup>+</sup>Foxp3<sup>+</sup> cell density was compared and showed no significant difference between any two groups ( $n = 5$ ; one-way ANOVA followed by Tukey's test).
